# Supplementary material
Source: PubMed Central journal article supplement (PMC373323)
Supplement: nar_32_2_681__1.pdf [file nar_32_2_681__1.pdf]

**Supplementary Material Table 1.** Nearest neighbor parameters for oligonucleotides in 1M NaCl

| Sequence | $\Delta H$ (kcal/mol) | $\Delta S$ (cal/k·mol) | $\Delta G_{37}$ (kcal/mol) | reference |
|----------|-----------------------|------------------------|----------------------------|-----------|
| AA/TT    | -7.9                  | -22.2                  | -1 <sup>1</sup>            | (1)       |
| AT/TA    | -7.2                  | -20.4                  | -0.88 <sup>1</sup>         | (1)       |
| TA/AT    | -7.2                  | -21.3                  | -0.58 <sup>1</sup>         | (1)       |
| CA/GT    | -8.5                  | -22.7                  | -1.45 <sup>1</sup>         | (1)       |
| GT/CA    | -8.4                  | -22.4                  | -1.44 <sup>1</sup>         | (1)       |
| CT/GA    | -7.8                  | -21                    | -1.28 <sup>1</sup>         | (1)       |
| GA/CT    | -8.2                  | -22.2                  | -1.3 <sup>1</sup>          | (1)       |
| CG/GC    | -10.6                 | -27.2                  | -2.17 <sup>1</sup>         | (1)       |
| GC/CG    | -9.8                  | -28.2                  | -2.24 <sup>1</sup>         | (1)       |
| GG/CC    | -8                    | -19.9                  | -1.84 <sup>1</sup>         | (1)       |
| AA/TA    | 1.2                   | 1.91                   | 0.61                       | (2)       |
| CA/GA    | -0.9                  | -4.29                  | 0.43                       | (2)       |
| GA/CA    | -2.9                  | -9.9                   | 0.17                       | (2)       |
| TA/AA    | 4.7                   | 12.93                  | 0.69                       | (2)       |
| AC/TC    | 0                     | -4.29                  | 1.33                       | (2)       |
| CC/GC    | -1.5                  | -7.1                   | 0.7                        | (2)       |
| GC/CC    | 3.6                   | 9.07                   | 0.79                       | (2)       |
| TC/AC    | 6.1                   | 16.29                  | 1.05                       | (2)       |
| AG/TG    | -3.1                  | -9.58                  | -0.13                      | (2)       |
| CG/GG    | -4.9                  | -15.45                 | -0.11                      | (2)       |
| GG/CG    | -6                    | -15.77                 | -1.11                      | (2)       |

|       |      |        |       |     |
|-------|------|--------|-------|-----|
| TG/AG | -1.6 | -6.58  | 0.44  | (2) |
| AT/TT | -2.7 | -10.94 | 0.69  | (2) |
| CT/GT | -5   | -15.74 | -0.12 | (2) |
| GT/CT | -2.2 | -8.55  | 0.45  | (2) |
| TT/AT | 0.2  | -1.55  | 0.68  | (2) |
| AA/TC | 2.3  | 4.6    | 0.88  | (3) |
| AC/TA | 5.3  | 14.6   | 0.77  | (3) |
| CA/GC | 1.9  | 3.7    | 0.75  | (3) |
| CC/GA | 0.6  | -0.6   | 0.79  | (3) |
| GA/CC | 5.2  | 14.2   | 0.81  | (3) |
| GC/CA | -0.7 | -3.8   | 0.47  | (3) |
| TA/AC | 3.4  | 8      | 0.92  | (3) |
| TC/AA | 7.6  | 20.2   | 1.33  | (3) |
| AC/TT | 0.7  | 0.2    | 0.64  | (4) |
| AT/TC | -1.2 | -6.2   | 0.73  | (4) |
| CC/GT | -0.8 | -4.5   | 0.62  | (4) |
| CT/GC | -1.5 | -6.1   | 0.4   | (4) |
| GC/CT | 2.3  | 5.4    | 0.62  | (4) |
| GT/CC | 5.2  | 13.5   | 0.98  | (4) |
| TC/AT | 1.2  | 0.7    | 0.97  | (4) |
| TT/AC | 1    | 0.7    | 0.75  | (4) |
| AA/TG | -0.6 | -2.3   | 0.14  | (5) |
| AG/TA | -0.7 | -2.3   | 0.02  | (5) |

|                             |      |       |                   |     |
|-----------------------------|------|-------|-------------------|-----|
| CA/GG                       | -0.7 | -2.3  | 0.03              | (5) |
| CG/GA                       | -4   | -13.2 | 0.11              | (5) |
| GA/CG                       | -0.6 | -1    | -0.25             | (5) |
| GG/CA                       | 0.5  | 3.2   | -0.52             | (5) |
| TA/AG                       | 0.7  | 0.7   | 0.42              | (5) |
| TG/AA                       | 3    | 7.4   | 0.74              | (5) |
| AG/TT                       | 1    | 0.9   | 0.71              | (6) |
| AT/TG                       | -2.5 | -8.3  | 0.07              | (6) |
| CG/GT                       | -4.1 | -11.7 | -0.47             | (6) |
| AT/GG                       | -2.8 | -8    | -0.32             | (6) |
| GG/CT                       | 3.3  | 10.4  | 0.08              | (6) |
| GG/TT                       | 5.8  | 16.3  | 0.74              | (6) |
| GT/CG                       | -4.4 | -12.3 | -0.59             | (6) |
| GT/TG                       | 4.1  | 9.5   | 1.15              | (6) |
| TG/AT                       | -0.1 | -1.7  | 0.43              | (6) |
| TG/GT                       | -1.4 | -6.2  | 0.52              | (6) |
| TT/AG                       | -1.3 | -5.3  | 0.34              | (6) |
| Initiate w/<br>terminal G·C | 0.1  | -2.8  | 0.98 <sup>1</sup> | (1) |
| Initiate w/<br>terminal A·T | 2.3  | 4.1   | 1.03 <sup>1</sup> | (1) |
| Symmetric<br>Correction     | 0    | -1.4  | 0.4 <sup>1</sup>  | (1) |

---

<sup>1</sup>Calculated from  $\Delta G_T^o = \Delta H^o - T\Delta S^o$ .

## REFERENCES

1. SantaLucia, J., Jr. (1998) A unified view of polymer, dumbbell, and oligonucleotide DNA nearest-neighbor thermodynamics. *Proc. Natl. Acad. Sci. USA*, **95**, 1460-1465.
2. Peyret, N., Seneviratne, P.A., Allawi, H.T. and SantaLucia, J., Jr. (1999) Nearest-neighbor thermodynamics and NMR of DNA sequences with internal A.A, C.C, G.G, and T.T mismatches. *Biochemistry*, **38**, 3468-3477.
3. Allawi, H.T. and SantaLucia, J., Jr. (1998) Nearest-neighbor thermodynamics of internal A.C mismatches in DNA: sequence dependence and pH effects. *Biochemistry*, **37**, 9435-9444.
4. Allawi, H.T. and SantaLucia, J., Jr. (1998) Thermodynamics of internal C.T mismatches in DNA. *Nucl. Acids Res.*, **26**, 2694-2701.
5. Allawi, H.T. and SantaLucia, J., Jr. (1998) Nearest neighbor thermodynamic parameters for internal G.A mismatches in DNA. *Biochemistry*, **37**, 2170-2179.
6. Allawi, H.T. and SantaLucia, J., Jr. (1997) Thermodynamics and NMR of internal G.T mismatches in DNA. *Biochemistry*, **36**, 10581-10594.
